# Supplementary material
Source: PubMed Central journal article supplement (PMC8205952)
Supplement: NIHMS1684342-supplement-1.pdf [file NIHMS1684342-supplement-1.pdf]

Supplement Table 1 – Patients and targets characteristics

| Patient number | Location   | Age | Stage | Number of CBCTs | CTV size (cm <sup>3</sup> )<br><i>planning CT</i> |          | CTV size (cm <sup>3</sup> )<br><i>Last CBCT</i> |          | Weight change (kg) |
|----------------|------------|-----|-------|-----------------|---------------------------------------------------|----------|-------------------------------------------------|----------|--------------------|
|                |            |     |       |                 | High risk                                         | Low risk | High risk                                       | Low risk |                    |
| 1              | Oropharynx | 58  | T3N0  | 33              | 46.2                                              | 121.8    | 39.4                                            | 111.7    | -5.5               |
| 2              | Oropharynx | 71  | T4N0  | 32              | 21.7                                              | 97.6     | 20.4                                            | 82.6     | -5.4               |
| 3              | Oropharynx | 70  | T2N1  | 33              | 62.7                                              | 115.5    | 55.8                                            | 108.3    | -12.1              |
| 4              | Oropharynx | 70  | T2N1  | 32              | 27.2                                              | 60.4     | 22.6                                            | 53.5     | -5.3               |
| 5              | Tongue     | 64  | T1N2  | 35              | 33.0                                              | 107.3    | 34.8                                            | 107.3    | -1.4               |
| 6              | Larynx     | 62  | T2N2  | 33              | 10.2                                              | 65.5     | 9.0                                             | 62.1     | -3.9               |
| 7              | Larynx     | 68  | T2N2  | 34              | 19.8                                              | 65.3     | 18.8                                            | 59.4     | -7.3               |
| 8              | Oropharynx | 52  | T4N1  | 30              | 255.7                                             | 200.5    | 246.1                                           | 200.6    | -6                 |
| 9              | Oropharynx | 67  | T4N2  | 34              | 121.8                                             | 26.6     | 121.8                                           | 37.7     | -4.7               |
| 10             | Tongue     | 57  | T2N2  | 32              | 52.8                                              | 94.0     | 56.9                                            | 103.9    | 1.9                |

Abbreviations: CBCT = cone-beam computed tomography; CTV = clinical target volume; CT = Computed tomography;
